# Supplementary material
Source: Springer Nature journal article supplement (https://www.springermedizin.de/resource/supplementary/12885_2013_4124_MOESM2_ESM.pdf/9465450)
Supplement: MOESM2 [file 9465450]

*Comparison of Parameter estimates from Cox model and a logistic regression model*

In Additional Table 1 the parameter estimates from a standard Cox regression model on the original dataset, and the logistic regression model on the expanded person-period dataset are compared. These models were only fitted to a limited number of covariates and ignore the multilevel structure of the data. However they illustrate that censoring is treated the same way with both analytical approaches and that logistic regression with a person-period dataset is a good approximation to Cox modeling.
